# Supplementary material for: Impacts of Short-Rotation Early-Growing Season Prescribed Fire on a Ground Nesting Bird in the Central Hardwoods Region of North America
Source: PLoS One. 2016 Jan 21;11(1):e0147317. doi: 10.1371/journal.pone.0147317 (PMC4721652; doi:10.1371/journal.pone.0147317)
Supplement: S1 Dataset — (XLSX) [file pone.0147317.s001.xlsx]

## Sheet: Nest Success
Turkey ID	Days Survived	Fate	Nest Attempt	Year	Age	Prescribed Fire	Cover Type	Incubation Date
104755	11	1	0	0	1	1	1	2012-05-03
104756	9	1	0	0	1	0	0	-
104764	26	1	0	0	1	1	1	2012-04-25
104767	8	1	0	0	0	1	1	2012-05-02
104768	28	0	0	0	1	0	1	2012-05-16
104783	27	1	0	0	1	0	1	2012-06-12
104784	16	1	0	0	1	0	1	2012-05-05
104784	2	1	0	0	1	0	0	-
104765	15	1	0	1	1	0	1	2013-05-19
104766	13	1	0	1	1	0	1	2013-05-25
104790	9	1	0	1	0	0	0	2013-06-20
117776	4	1	0	1	1	0	1	2013-06-28
117777	20	1	0	1	0	1	1	2013-06-04
126436	3	1	0	1	1	1	0	2013-06-18
126439	5	1	0	1	1	1	1	2013-07-01
126441	18	1	0	1	0	0	0	2013-05-21
126443	7	1	0	1	1	0	0	2013-07-02
126446	20	1	0	1	1	1	0	2013-06-24
104755	1	1	1	0	1	1	0	-
104756	24	1	1	0	1	0	0	2012-04-17
104760	28	0	1	0	1	0	1	2012-04-25
104761	6	1	1	0	0	1	1	2012-04-17
104762	28	0	1	0	1	1	1	2012-04-16
104764	12	1	1	0	1	0	1	-
104767	15	1	1	0	0	1	0	2012-04-10
104768	22	1	1	0	1	1	1	2012-04-03
104769	28	0	1	0	1	1	1	2012-04-04
104770	27	1	1	0	1	1	0	2012-04-18
104771	25	1	1	0	1	1	0	-
104772	13	1	1	0	1	0	0	2012-04-16
104773	28	0	1	0	1	0	0	2012-04-13
104774	5	1	1	0	1	1	0	2012-04-24
104775	22	1	1	0	1	1	0	2012-04-14
104776	7	1	1	0	0	0	1	2012-05-19
104777	17	1	1	0	1	1	0	2012-04-19
104778	27	1	1	0	1	1	0	2012-04-10
104779	26	1	1	0	1	0	0	2012-04-10
104780	28	0	1	0	1	0	0	2012-04-11
104783	22	1	1	0	1	1	0	2012-04-14
104784	4	1	1	0	1	0	0	2012-04-07
104785	18	1	1	0	1	1	0	2012-04-30
104786	20	1	1	0	1	1	0	2012-04-15
104789	28	0	1	0	1	0	0	2012-04-28
104790	5	1	1	0	1	0	0	2012-04-04
104791	27	1	1	0	1	0	0	2012-04-17
104753	4	1	1	1	0	0	0	2013-05-12
104757	28	0	1	1	1	0	1	2013-05-02
104763	26	1	1	1	1	1	0	2013-04-17
104765	4	1	1	1	1	0	1	2013-04-20
104765	5	1	1	1	1	0	0	-
104766	6	1	1	1	1	1	1	2013-05-02
104770	8	1	1	1	1	1	0	2013-04-29
104773	28	0	1	1	1	1	0	2013-05-02
104774	21	1	1	1	1	1	0	2013-05-24
104775	5	1	1	1	1	1	0	2013-04-21
104780	28	0	1	1	1	1	0	-
104783	11	1	1	1	1	1	0	2013-04-21
104785	23	1	1	1	1	1	0	2013-05-11
104787	9	1	1	1	1	1	0	2013-05-04
104788	4	1	1	1	0	0	0	2013-05-06
117776	13	1	1	1	1	0	1	2013-05-06
117777	2	1	1	1	0	1	0	2013-05-11
117778	9	1	1	1	1	0	0	2013-05-01
117779	11	1	1	1	0	0	1	2013-05-07
117780	3	1	1	1	0	1	0	2013-05-25
126436	20	1	1	1	1	1	0	2013-04-29
126437	28	0	1	1	1	0	1	2013-05-09
126438	17	1	1	1	0	1	0	2013-05-04
126439	15	1	1	1	1	1	1	2013-05-23
126442	18	1	1	1	1	1	1	2013-04-25
126443	9	1	1	1	1	0	0	2013-04-28
126444	24	1	1	1	0	1	0	2013-05-03
126445	2	1	1	1	1	1	0	-
126446	22	1	1	1	1	1	0	2013-04-28
126447	26	1	1	1	1	1	0	2013-05-01
126448	14	1	1	1	0	1	0	2013-05-03
126450	28	0	1	1	1	1	0	2013-04-29
126451	28	0	1	1	1	1	0	2013-04-30
Key
Fate	1=Destroyed, 0=Hatched
Nest Attempt	1=Initial Nest Attempt, 0=Renest Attempt
Year	1=2013, 0=2012
Age	1=adult,0=sub-adult
Prescribed Fire	1=Treated, 0=Untreated
Cover Type	1=pine, 0=hardwood
*Missing dates indicate a nest that a single data of incubation intation was unable to be determined. Only determined incubation intiation dates were used in summary statistics.
	Incubation Date

## Sheet: Nest Site Selection
Turkey ID	Age	Nest Fate	Lat	Lon	Plot Type	Year	% Visual Concealment (0-1 m)	% Visual Concealment (1-2 m)	Understory Height (m)	% Canopy Openness	Slope	Slope Position (100 = Ridge Top)	Small Trees (<10 cm DBH)	Medium Trees (10-20 cm DBH)	Large Trees (>20 cm DBH)	Small Shrubs (<5 cm ground diameter)	Large Shrubs (≥5 cm ground diameter)	% Grass Ground Cover	% Herbaceous Ground Cover	% Woody Ground Cover	Time Since Last Prescribe Fire	Cover Type	Distance To Nearest Road (m)	Prescribed Fire Treatment
-	-	-	35.6456	-93.9952	Available	2012	0.418333	0.205	1.15	1.1	11	100	2	0	11	27	1	0	0	17.5	-	Pine	19.3581	Untreated
-	-	-	35.6214	-94.0032	Available	2012	0.824444	0.545	1.725	16.5	29	60	11	4	4	8	0	0	0	5	-	Pine	38.5022	Untreated
-	-	-	35.6315	-93.9445	Available	2012	0.973333	0.17	1.275	68.6	16	0	14	9	4	28	7	22.5	22.5	50	-	Pine	10.0495	Untreated
-	-	-	35.7643	-93.868	Available	2012	0.442778	0.035	1.3	1	24	10	16	5	2	46	9	0	0	27.5	-	Hardwood	162.742	Untreated
-	-	-	35.7789	-93.899	Available	2012	0.402222	0.2	1.4	0	8	100	11	1	6	28	4	5	0	15	-	Hardwood	74.8474	Untreated
-	-	-	35.7651	-93.8787	Available	2012	0.445556	0.035	0.45	1.7	50	60	2	6	6	19	1	0	0	12.5	-	Hardwood	154.982	Untreated
-	-	-	35.7871	-93.9458	Available	2012	0.311111	0	0.6	3	32	100	6	0	6	19	6	0	0	0	-	Hardwood	45.8071	Untreated
-	-	-	35.7755	-93.9786	Available	2012	0.288889	0.166	0.6	2	31	90	12	2	7	10	2	0	0	0	-	Hardwood	264.972	Untreated
-	-	-	35.611	-93.9203	Available	2012	0.0288889	0	0.2	0	14	20	10	7	7	6	8	0	2.5	0	-	Hardwood	114.07	Untreated
-	-	-	35.7569	-94.0339	Available	2012	0.14	0.056	0.3	1	14	20	10	4	8	9	6	0	0	5	-	Hardwood	190.858	Untreated
-	-	-	35.6502	-94.0462	Available	2012	0.326667	0	0.4	0	33	30	12	3	7	37	9	5	0	0	-	Hardwood	184.786	Untreated
-	-	-	35.6117	-93.9951	Available	2012	0.496111	0.07	0.675	31.4	8	100	0	0	0	39	2	30	0	5	-	Pine	21.9959	Untreated
-	-	-	35.6809	-93.8511	Available	2012	1	0.196	1.6	7	18	80	0	1	7	26	0	0	0	0	0	Hardwood	43.4011	Treated
-	-	-	35.6854	-93.8692	Available	2012	0.251111	0	0.5	0	11	100	3	4	8	21	0	0	0	0	0	Hardwood	18.2057	Treated
-	-	-	35.7752	-93.9025	Available	2012	0.418333	0.095	0.95	1	45	0	14	1	5	18	0	2.5	0	70	-	Hardwood	46.8373	Untreated
-	-	-	35.6861	-93.8617	Available	2012	0.133333	0	0.2	0	17	90	3	6	3	2	0	0	0	15	0	Hardwood	33.0058	Treated
-	-	-	35.6851	-93.8662	Available	2012	0.162222	0	0.2	0	24	80	12	4	14	4	0	0	0	0	0	Hardwood	10.5139	Treated
-	-	-	35.6784	-93.8766	Available	2012	0.333333	0	0.4	0	60	50	0	2	0.3	0	0	0	6.3	0	0	Hardwood	85.0668	Treated
-	-	-	35.6516	-93.9998	Available	2012	0.348889	0.08	0.825	1	67	20	6	2	0	33	9	0	0	12.5	-	Hardwood	273.074	Untreated
-	-	-	35.6716	-93.8744	Available	2012	1	0.86	1.9	11	41	90	2	3	6	4	1	0	1.3	25	0	Hardwood	77.1667	Treated
-	-	-	35.6792	-93.8689	Available	2012	0.195556	0	0.3	0	9	10	0	0.3	2.5	0	0	0	50	10	0	Pine	62.3947	Treated
-	-	-	35.6793	-93.8635	Available	2012	0.3	0.07	0.5	0	39	60	4	2	7	10	3	0	0	10	0	Hardwood	50.0516	Treated
-	-	-	35.7489	-93.8343	Available	2012	0.666667	0.606	2	0	16	40	3	1	3	32	6	0	0	40	1	Hardwood	144.414	Treated
-	-	-	35.7052	-93.9982	Available	2012	0.195556	0	0.4	0	20	30	4	6	4	8	0	0	17.5	0	2	Hardwood	132.984	Treated
-	-	-	35.7283	-93.9457	Available	2012	0.0844444	0	0.1	0	77	40	10	3	8	10	6	35	2.5	5	2	Hardwood_Pine	62.2464	Treated
-	-	-	35.7348	-93.9276	Available	2012	0.0777778	0	0.2	8	18	100	4	4	8	4	2	0	0	30	2	Hardwood_Pine	199.137	Treated
-	-	-	35.6946	-93.8455	Available	2012	0.273333	0.06	0.2	0	40	50	11	3	9	2	3	0	0	0	0	Hardwood	127.05	Treated
-	-	-	35.6792	-93.8907	Available	2012	0.333333	0.316	0.9	1	61	50	2	5	9	6	9	0	0	0	0	Hardwood	15.566	Treated
-	-	-	35.705	-93.8897	Available	2012	0.133333	0.01	0.1	0	8	0	0	0.3	1.3	0	0	0	3.8	0	0	Pine	4.9879	Treated
-	-	-	35.6421	-94.0139	Available	2012	0.355556	0.185	1.175	1	19	60	13	7	3	25	1	0	0	50	-	Pine	161.762	Untreated
-	-	-	35.6854	-93.8759	Available	2012	0.333333	0.206	1.2	0	9	50	4	3	17	34	0	0	0	5	0	Pine	39.7504	Treated
-	-	-	35.6872	-93.8682	Available	2012	0.251111	0	0.2	0	10	60	0	0	3.3	0	0	5	47.5	5	0	Hardwood	46.6852	Treated
-	-	-	35.7155	-93.8897	Available	2012	0.666667	0.206	1	0	19	40	0	0	7	15	4	0	15	0	0	Hardwood	14.7822	Treated
-	-	-	35.7054	-93.8598	Available	2012	0.666667	0.036	1.2	0	4	10	4	2	6	32	0	0	7.5	0	0	Pine	33.3655	Treated
-	-	-	35.6724	-93.882	Available	2012	0.133333	0.02	0.2	0	6	0	0	1.5	2.3	0	0	0	12.5	0	0	Pine_Hardwood	12.4066	Treated
-	-	-	35.6798	-93.8793	Available	2012	0.291111	0.046	0.9	0	8	0	2	9	6	30	0	0	20	65	0	Pine_Hardwood	149.877	Treated
-	-	-	35.7122	-93.841	Available	2012	1	0.576	1.6	0	41	80	6	2	5	32	5	0	0	75	1	Hardwood	36.4294	Treated
-	-	-	35.7023	-93.871	Available	2012	0.6	0.17	0.9	0	35	20	4	0	6	0	0	0	90	5	1	Hardwood	115.321	Treated
-	-	-	35.7196	-93.8823	Available	2012	0.633333	0.276	1.4	0	0	100	0	0	10	11	3	0	5	0	1	Pine_Hardwood	20.5753	Treated
-	-	-	35.7323	-93.8565	Available	2012	1	1	2	96	40	80	2	0	0	48	20	5	0	0	1	Hardwood	26.5181	Treated
-	-	-	35.7235	-93.8549	Available	2012	0.177778	0.056	0.5	0	8	10	3	2	6	31	5	0	0	0	1	Hardwood	15.3366	Treated
-	-	-	35.7097	-93.8359	Available	2012	0.666667	0.64	1.8	0	44	70	1	4	7	44	3	0	2.5	0	1	Hardwood	261.361	Treated
-	-	-	35.7653	-93.8564	Available	2012	0.211111	0	0.4	1.1	27	80	7	4	3	13	8	0	0	32.5	-	Hardwood	153.049	Untreated
-	-	-	35.7159	-93.8275	Available	2012	1	0.04	1.4	0	24	80	0	0	12	22	0	0	25	0	1	Hardwood	65.5694	Treated
-	-	-	35.7158	-93.8407	Available	2012	1	0.826	2	0	45	80	0	0	0.8	0	0	0	0	75	1	Hardwood	97.5261	Treated
-	-	-	35.6831	-93.9067	Available	2012	0.333333	0.156	0.9	3	45	0	3	0	8	26	5	0	47.5	40	2	Hardwood	18.0426	Treated
-	-	-	35.6703	-93.9084	Available	2012	0.0733333	0	0.2	0	4	100	10	5	7	6	0	60	30	0	2	Pine	97.0063	Treated
-	-	-	35.6598	-94.0215	Available	2012	0.99	0.65	2	1	8	100	7	10	0	27	2	2.5	50	47.5	-	Hardwood	116.207	Untreated
-	-	-	35.7237	-93.9011	Available	2012	0.0844444	0	0.5	0	7	100	12	4	6	10	0	0	0	0	2	Pine	113.257	Treated
-	-	-	35.7334	-93.8719	Available	2012	1	0.596	1.5	0	19	50	4	5	0	57	3	0	0	0	2	Hardwood	118.866	Treated
-	-	-	35.717	-93.9092	Available	2012	0.117778	0	0.2	0	16	90	5	8	13	10	1	0	0	0	2	Hardwood_Pine	21.8483	Treated
-	-	-	35.7257	-93.8948	Available	2012	1	0.78	2	0	47	80	2	5	6	42	0	0	0	70	2	Hardwood	175.456	Treated
-	-	-	35.7249	-93.8917	Available	2012	0.333333	0.456	1.3	0	28	40	0	3	9	28	17	0	91.3	0	2	Hardwood	90.631	Treated
-	-	-	35.7194	-93.93	Available	2012	1	0.976	2	1	38	90	11	0	0	22	30	0	0	10	6	Hardwood	39.4953	Treated
-	-	-	35.6314	-93.9269	Available	2013	0.469444	0	0.375	36.2	8	100	0	0	1.5	7.25	0.25	47.5	17.5	35	-	Pine	2.76019	Untreated
-	-	-	35.7323	-93.9258	Available	2012	1	0.55	1.7	0	35	60	2	1	9	51	3	0	0	0	6	Pine	29.4657	Treated
-	-	-	35.7267	-93.9283	Available	2012	0.666667	0.61	1.7	0	16	50	5	1	3	42	0	0	0	80	6	Hardwood	100.776	Treated
-	-	-	35.7007	-93.9234	Available	2012	0.388889	0.21	1.4	2	22	60	1	1	9	35	0	0	0	0	6	Hardwood_Pine	155.971	Treated
-	-	-	35.7273	-93.9294	Available	2012	0.406667	0	0.9	0	64	30	4	5	9	11	0	0	0	0	6	Pine	117.496	Treated
-	-	-	35.6509	-93.9594	Available	2012	0.322222	0.356	1.7	0	35	70	2	4	8	43	4	0	0	15	6	Hardwood	155.195	Treated
-	-	-	35.6719	-93.9523	Available	2012	0.48	0.28	1.4	0	11	50	7	5	4	27	0	0	0	0	6	Hardwood	36.1106	Treated
-	-	-	35.6563	-93.9464	Available	2012	0.666667	0.946	2	19	17	90	1	1	3	29	9	0	0	0	6	Hardwood	0.880299	Treated
-	-	-	35.6525	-93.9541	Available	2012	0.873333	0.29	1.4	0	8	100	0	7	5	24	5	0	12.5	15	6	Pine	267.817	Treated
-	-	-	35.667	-93.8692	Available	2012	0.648889	0.05	0.5	7	72	60	0	1	10	17	3	0	45	0	6	Pine	83.8957	Treated
-	-	-	35.6654	-93.8606	Available	2012	0.666667	0.256	1.1	0	33	60	4	3	6	28	0	0	2.5	0	6	Pine	127.533	Treated
-	-	-	35.6691	-93.863	Available	2012	0.322222	0.266	1.3	0	80	60	12	3	3	37	7	0	0	0	6	Hardwood	5.99324	Treated
-	-	-	35.6417	-93.8815	Available	2012	0.3	0	0.7	0	54	80	7	7	7	17	6	0	5	0	6	Hardwood	84.8424	Treated
-	-	-	35.6522	-93.8828	Available	2012	0.666667	0.61	1.8	0	21	90	2	6	4	90	18	0	7.5	0	6	Hardwood	3.20267	Treated
-	-	-	35.6468	-93.8673	Available	2012	0.162222	0	0.4	0	55	90	2	2	11	12	3	0	50	0	6	Hardwood	142.181	Treated
-	-	-	35.6321	-93.9106	Available	2012	0.422222	0.386	1.7	7	0	0	3	4	5	37	0	0	10	40	3	Hardwood	254.187	Treated
-	-	-	35.63	-93.8993	Available	2012	0.117778	0	0.2	0	7	100	12	10	4	11	0	0	1.3	5	3	Pine	99.1518	Treated
-	-	-	35.6365	-93.9193	Available	2012	0.566667	0.686	1.6	0	50	80	10	1	2	47	3	5	0	0	3	Hardwood	32.5391	Treated
-	-	-	35.655	-93.9018	Available	2012	0.986667	0.91	2	0	30	80	7	0	3	46	24	0	1.3	0	6	Hardwood	20.3726	Treated
-	-	-	35.6504	-93.889	Available	2013	0.323333	0.145	1.65	1	60	70	0	1.75	0.25	6.25	0	10	15	35	-	Hardwood	41.0257	Untreated
-	-	-	35.6528	-93.9027	Available	2012	0.188889	0	0.2	0	10	100	0	0	0	0	0	0	6.3	0	6	Pine	172.643	Treated
-	-	-	35.6899	-94.0009	Available	2012	0.666667	0.986	1.9	0	13	90	0	1	3	25	8	0	0	65	3	Hardwood	47.9591	Treated
-	-	-	35.6822	-94.0036	Available	2012	0.277778	0.18	1.7	0	25	60	3	5	7	45	5	0	0	55	3	Hardwood	152.746	Treated
-	-	-	35.6611	-93.9752	Available	2012	0.2	0	0.4	0	13	50	3	4	8	2	0	0	0	0	3	Hardwood	71.0222	Treated
-	-	-	35.6603	-93.9749	Available	2012	0.224444	0	0.6	0	15	70	5	11	5	27	0	0	5	0	3	Pine_Hardwood	76.1757	Treated
-	-	-	35.6584	-94.0189	Available	2012	0.44	0	0.7	4	15	50	3	1	6	17	0	0	7.5	0	3	Hardwood	58.1139	Treated
-	-	-	35.6666	-93.9781	Available	2012	0.308889	0	0.4	0	11	80	2	0	8	15	0	0	0	0	3	Pine_Hardwood	14.3071	Treated
-	-	-	35.6954	-93.9686	Available	2012	0.6	0.556	1.9	0	38	40	4	3	10	34	8	0	0	0	3	Hardwood	93.9229	Treated
-	-	-	35.7789	-93.899	Available	2013	0.211111	0	0.5	0	25	30	7	4	6	9	0	0	0	0	-	Hardwood	75.0435	Untreated
-	-	-	35.7871	-93.9458	Available	2013	0.797778	0.416	1.3	0	30	40	3	14	4	26	6	0	0	5	-	Hardwood	45.8477	Untreated
-	-	-	35.7755	-93.9786	Available	2013	0.366667	0.43	1.4	0	14	90	7	2	6	29	10	0	0	25	-	Hardwood	264.817	Untreated
-	-	-	35.611	-93.9203	Available	2013	0.0177778	0	0.1	0	8	90	18	11	3	6	8	0	0	10	-	Hardwood	114.285	Untreated
-	-	-	35.6809	-93.8511	Available	2013	0.251111	0	0.2	0	8	80	3	7	10	3	0	0	85	0	1	Pine	43.6341	Treated
-	-	-	35.6861	-93.8617	Available	2013	0.155556	0	0.3	0	17	90	9	10	10	1	0	0	35	0	1	Pine	33.0649	Treated
-	-	-	35.6851	-93.8662	Available	2013	0.333333	0.786	2	0	8	100	3	9	7	47	25	0	0	0	1	Hardwood	10.3118	Treated
-	-	-	35.6851	-93.8662	Available	2013	0.333333	0.24	1.5	0	18	70	3	2	12	62	0	0	0	25	1	Hardwood	10.3118	Treated
-	-	-	35.6854	-93.8669	Available	2013	0.344444	0.09	0.9	0	10	80	7	3	11	41	0	0	0	30	1	Hardwood	34.5437	Treated
-	-	-	35.6784	-93.8766	Available	2013	0.384444	0.27	1.8	0	43	60	9	4	11	41	11	0	0	0	1	Hardwood	84.9367	Treated
-	-	-	35.6716	-93.8744	Available	2013	0.38	0.1	0.8	0	26	100	3	6	12	34	0	0	65	0	1	Hardwood	77.7306	Treated
-	-	-	35.6792	-93.8689	Available	2013	0.555556	0.27	1.7	0	10	10	2	9	9	39	13	0	0	0	1	Hardwood	62.3947	Treated
-	-	-	35.6793	-93.8635	Available	2013	0.666667	0.676	1.7	0	21	30	0	0	2	36	26	0	0	95	1	Hardwood	50.0516	Treated
-	-	-	35.7489	-93.8343	Available	2013	0.666667	0.89	2	0	7	100	0	4	5	62	18	0	0	30	1	Hardwood	144.414	Treated
-	-	-	35.7512	-93.8457	Available	2013	0.666667	0.956	2	29	22	50	0	0	0	43	67	5	0	0	1	Hardwood	54.3044	Treated
-	-	-	35.7052	-93.9982	Available	2013	0.311111	0.03	0.6	0	31	10	7	7	7	17	2	5	1.3	0	2	Hardwood	132.913	Treated
-	-	-	35.7283	-93.9457	Available	2013	1	0.38	1.3	0	35	80	0	0	7	32	1	25	0	0	2	Hardwood	62.2464	Treated
-	-	-	35.7347	-93.9276	Available	2013	0.24	0.04	0.8	10	36	50	15	10	2	10	1	10	0	0	2	Pine	199.66	Treated
-	-	-	35.6369	-93.9697	Available	2013	0.130556	0	0.3	1	20	100	0.5	2	2.25	13	1.75	0	0	11.25	-	Pine	66.5882	Untreated
-	-	-	35.6946	-93.8455	Available	2013	0.373333	0.07	0.5	0	21	60	7	3	5	16	9	0	2.5	0	6	Hardwood	127.335	Treated
-	-	-	35.6792	-93.8907	Available	2013	0.317778	0.02	0.9	0	17	80	17	6	3	19	3	0	0	15	6	Hardwood	15.802	Treated
-	-	-	35.705	-93.8897	Available	2013	0.715556	0.19	1.7	0	17	50	9	3	4	34	7	0	0	0	6	Hardwood	5.54	Treated
-	-	-	35.6854	-93.8759	Available	2013	0.306667	0.05	0.3	0	11	50	18	2	0	2	3	0	0	20	6	Hardwood	40.0225	Treated
-	-	-	35.6872	-93.8682	Available	2013	0.255556	0.126	0.5	0	27	50	10	0	8	5	2	0	0	0	6	Hardwood	46.7229	Treated
-	-	-	35.7155	-93.8897	Available	2013	0.666667	0.41	1.3	0	15	30	0	0	5	21	5	0	0	0	6	Hardwood	14.7837	Treated
-	-	-	35.7054	-93.8598	Available	2013	0.244444	0	0.6	0	8	100	0	0	0	0	0	5	15	0	6	Pine	33.3495	Treated
-	-	-	35.6724	-93.882	Available	2013	0.666667	0.12	1.3	0	15	100	1	1	4	29	6	5	15	50	6	Hardwood	12.127	Treated
-	-	-	35.6798	-93.8793	Available	2013	0.244444	0	0.6	0	63	90	2	2	10	11	2	0	0	15	6	Hardwood	150.047	Treated
-	-	-	35.7122	-93.841	Available	2013	0.322222	0	0.7	0	28	30	9	5	7	27	0	0	0	80	1	Hardwood	36.705	Treated
-	-	-	35.637	-93.9398	Available	2013	0.0722222	0	0.2	1	28	50	0.75	0	2.5	4.75	1	7.5	35	45	-	Hardwood	58.2219	Untreated
-	-	-	35.7154	-93.8555	Available	2013	0.166667	0	0.2	0	22	50	10	6	5	9	0	0	0	0	1	Pine_Hardwood	65.6498	Treated
-	-	-	35.7023	-93.871	Available	2013	0.666667	0	1.2	0	12	10	7	4	5	32	0	0	2.5	0	1	Pine	115.309	Treated
-	-	-	35.7196	-93.8823	Available	2013	1	0.92	2	0	66	70	5	2	2	29	24	0	0	0	1	Hardwood	20.8802	Treated
-	-	-	35.8015	-93.8537	Available	2013	0.313333	0.01	0.225	1.4	4	10	0	0	1.75	4.25	0	5	0	57.5	-	Pine	42.5578	Untreated
-	-	-	35.7323	-93.8565	Available	2013	0.533333	0.146	1.1	0	8	10	6	8	12	29	3	0	12.5	35	1	Pine_Hardwood	26.5607	Treated
-	-	-	35.7235	-93.8549	Available	2013	1	0.686	2	0	20	90	2	2	6	121	0	0	0	0	1	Hardwood	15.1241	Treated
-	-	-	35.7097	-93.8359	Available	2013	1	0.356	1.4	9	32	80	0	2	6	14	15	0	0	85	1	Hardwood	260.759	Treated
-	-	-	35.7159	-93.8275	Available	2013	0.666667	0.03	1.2	0	57	70	9	4	2	4	0	45	40	0	1	Hardwood	65.7759	Treated
-	-	-	35.7158	-93.8407	Available	2013	0.222222	0	0.3	0	22	60	0	0.8	2.5	0	0	35	30	0	1	Hardwood	97.7792	Treated
-	-	-	35.6831	-93.9067	Available	2013	0.333333	0	1	0	24	60	3	1	9	16	0	0	0	0	2	Hardwood	17.7516	Treated
-	-	-	35.6703	-93.9084	Available	2013	1	0.7	1.8	0	13	40	3	1	3	41	3	0	7.5	40	2	Hardwood	97.0696	Treated
-	-	-	35.7237	-93.9011	Available	2013	1	0.936	2	42	44	80	1	0	2	19	16	0	37.5	0	2	Hardwood	114.136	Treated
-	-	-	35.7334	-93.8718	Available	2013	0.328889	0.05	0.7	1	31	10	11	5	7	11	0	0	7.5	30	2	Hardwood	118.908	Treated
-	-	-	35.717	-93.9092	Available	2013	1	0.966	2	0	65	70	7	2	2	24	18	0	0	5	2	Hardwood	22.0525	Treated
-	-	-	35.633	-93.9763	Available	2013	0.154444	0	0.15	3.2	42	60	5	0.75	1.5	1.75	0.25	7.5	0	42.5	-	Pine	51.3964	Untreated
-	-	-	35.7257	-93.8948	Available	2013	0.195556	0	0.4	0	12	0	9	4	6	15	0	0	0	0	2	Hardwood	175.606	Treated
-	-	-	35.7249	-93.8917	Available	2013	1	0.94	2	0	19	60	0	0	9	91	7	0	0	0	2	Hardwood	90.8377	Treated
-	-	-	35.7194	-93.93	Available	2013	0.233333	0.05	0.4	0	33	30	14	9	3	9	0	0	0	5	6	Pine	39.3442	Treated
-	-	-	35.7323	-93.9258	Available	2013	0.306667	0	0.6	0	50	20	0	2	10	18	0	0	10	60	6	Pine	29.9565	Treated
-	-	-	35.7007	-93.9234	Available	2013	0.0777778	0	0.2	0	53	50	2	2	4	0	0	0	0	5	6	Pine	155.971	Treated
-	-	-	35.7273	-93.9294	Available	2013	0.328889	0.376	1.5	0	19	60	1	1	5	17	0	25	0	0	6	Pine	117.651	Treated
-	-	-	35.6719	-93.9523	Available	2013	0.195556	0	0.6	0	22	50	0	1	7	17	1	0	7.5	80	6	Hardwood_Pine	36.0134	Treated
-	-	-	35.6509	-93.9594	Available	2013	0.177778	0.106	1.3	0	30	40	8	8	4	10	1	0	0	0	6	Pine	155.21	Treated
-	-	-	35.6562	-93.9464	Available	2013	0.333333	0.02	0.9	0	3	0	5	9	1	10	9	0	0	0	6	Hardwood_Pine	0.819412	Treated
-	-	-	35.6527	-93.9544	Available	2013	0.533333	0.1	1.1	0	29	50	5	0	7	19	2	0	0	0	6	Pine	230.621	Treated
-	-	-	35.6493	-93.9838	Available	2013	0.793333	0.455	0.575	15.4	10	100	1	0.25	2.25	8.25	0.5	0	37.5	0	-	Hardwood	59.4619	Untreated
-	-	-	35.667	-93.8692	Available	2013	0.78	0	0.7	0	26	90	2	6	2	4	0	0	17.5	0	0	Hardwood	84.2071	Treated
-	-	-	35.6654	-93.8606	Available	2013	0.595556	0.58	1.5	0	13	30	9	7	7	27	10	0	2.5	35	0	Hardwood	127.36	Treated
-	-	-	35.637	-93.9398	Available	2013	0.305556	0.015	0.375	1	15	50	1.25	1	0	3	4.25	0	0	30	-	Hardwood	58.2219	Untreated
-	-	-	35.6691	-93.863	Available	2013	0.0733333	0	0.6	0	9	100	0	0	0	2	1	0	25	0	0	Pine	6.54737	Treated
-	-	-	35.6417	-93.8815	Available	2013	0.633333	0.06	1.2	0	21	100	3	1	5	19	1	0	2.5	0	0	Hardwood	84.4802	Treated
-	-	-	35.6522	-93.8828	Available	2013	0.224444	0	0.4	6	68	80	4	3	9	6	1	0	0	0	0	Hardwood	3.32452	Treated
-	-	-	35.6468	-93.8674	Available	2013	0.322222	0.05	0.7	0	14	90	0	1	1	0	0	0	55	5	0	Hardwood	142.458	Treated
-	-	-	35.6321	-93.9106	Available	2013	0.666667	0.626	1	0	9	100	1	3	3	28	10	10	5	0	3	Pine	254.484	Treated
-	-	-	35.6365	-93.9193	Available	2013	0.251111	0.116	1.1	0	27	60	3	1	12	8	3	0	2.5	0	3	Hardwood	32.2021	Treated
-	-	-	35.655	-93.9018	Available	2013	0.14	0	0.4	0	21	50	0	0	10	5	0	0	0	0	6	Hardwood_Pine	19.922	Treated
-	-	-	35.6528	-93.9027	Available	2013	0.408889	0	0.5	2	32	0	10	7	8	10	4	25	0	25	6	Hardwood	172.578	Treated
-	-	-	35.6899	-94.0009	Available	2013	0.333333	0.12	1.2	0	17	70	3	1	5	20	7	0	0	0	3	Hardwood	47.4558	Treated
-	-	-	35.6822	-94.0036	Available	2013	0.111111	0	0.3	0	16	70	7	4	5	4	2	10	0	5	3	Hardwood_Pine	152.746	Treated
-	-	-	35.6611	-93.9752	Available	2013	1	1	2	0	65	90	32	0	0	79	85	0	42.5	15	3	Hardwood	70.4278	Treated
-	-	-	35.6603	-93.9749	Available	2013	0.533333	0.986	2	0	10	70	6	0	0	37	35	0	30	0	3	Hardwood	76.1757	Treated
-	-	-	35.6666	-93.9781	Available	2013	0.493333	0.356	0.9	0	5	100	0	3	2	19	0	0	67.5	0	3	Pine	13.7743	Treated
-	-	-	35.6954	-93.9686	Available	2013	0.328889	0.16	1.4	9	21	70	0	0	10	28	5	0	72.5	20	3	Pine	93.9714	Treated
104756	Adult	Destroyed	35.6472	-93.9929	Nest	2012	0.646111	0.075	0.575	14.9	16	10	10	0	8	39	16	0	2.5	60	-	Pine	10.3287	Untreated
104757	Adult	Hatched	35.6294	-93.9247	Nest	2013	0.911667	0.245	1.2	17.3	7	80	0	1.25	0	4	0	1.25	0	40	-	Pine	15.8449	Untreated
104760	Adult	Hatched	35.6194	-94.0054	Nest	2012	0.948333	0.73	1.8	25.6	16	10	10	3	10	16	12	0	7.5	52.5	-	Pine	23.3828	Untreated
104761	Sub-Adult	Destroyed	35.654	-93.9647	Nest	2012	0.795	0.185	0.975	6.1	27	0	7	4	8	25	14	0	0	82.5	6	Pine	23.6201	Treated
104762	Adult	Hatched	35.6502	-93.923	Nest	2012	0.813333	0	1	2.5	33	60	6	1	5	25	26	25	20	17.5	3	Pine	13.9901	Treated
104763	Adult	Destroyed	35.6851	-93.9108	Nest	2013	0.543333	0.555	1.46667	1.6	27	100	7.25	0	0	0	0.25	0	0	27.5	3	Hardwood	46.4431	Treated
104764	Adult	Destroyed	35.6314	-93.9459	Nest	2012	0.963333	0.015	1.025	98.7	22	10	7	6	2	37	1	43.75	0	48.75	-	Pine	24.4531	Untreated
104765	Adult	Destroyed	35.691	-93.8392	Nest	2013	0.0972222	0	0.725	2.7	32	100	1	0	2.75	4.5	1.75	0	0	2.5	0	Hardwood	18.9021	Treated
104766	Adult	Destroyed	35.6533	-93.8898	Nest	2013	0.463333	0.05	0.475	1	20	40	2.25	1	1.75	0.25	1.5	0	7.5	35	4	Pine	69.824	Treated
104767	Sub-Adult	Destroyed	35.6907	-93.9685	Nest	2012	0.319444	0.07	1.9	1	52	50	14	4	1	31	0	12.5	0	15	3	Hardwood	61.1303	Treated
104768	Adult	Destroyed	35.6492	-93.9617	Nest	2012	0.976667	0.735	1.7	3.6	23	100	8	6	4	10	7	0	0	62.5	6	Pine	51.3255	Treated
104769	Adult	Hatched	35.6676	-93.9561	Nest	2012	0.765	0.54	1.7	5.2	12	20	6	14	1	20	4	0	0	65	6	Pine	13.6449	Treated
104770	Adult	Destroyed	35.6902	-93.8401	Nest	2013	0.573889	0.11	1.325	18.7	32	70	1.25	0.5	2	0	0	2.5	0	5	0	Hardwood	32.0271	Treated
104770	Adult	Destroyed	35.6903	-93.9309	Nest	2012	0.913333	0.07	1.55	1.9	25	20	41	0	2	19	26	15	17.5	62.5	6	Hardwood	38.4346	Treated
104771	Adult	Destroyed	35.7006	-93.9755	Nest	2012	0.878333	0.73	1.975	5.5	46	70	6	1	7	22	19	0	0	60	2	Hardwood	43.5073	Treated
104772	Adult	Destroyed	35.7636	-93.8714	Nest	2012	0.76	0.015	1.2	1	36	90	8	5	4	19	13	0	0	90	-	Hardwood	13.7785	Untreated
104773	Adult	Hatched	35.631	-93.9036	Nest	2013	0.966667	0.2	1.3	13.8	11	100	0.25	1.5	0.75	7.75	0	15	0	55	4	Pine	31.7388	Treated
104773	Adult	Hatched	35.7671	-93.8765	Nest	2012	0.913333	0.355	1.425	1.9	35	100	8	6	7	23	14	0	0	100	-	Hardwood	6.09029	Untreated
104774	Adult	Destroyed	35.7506	-93.8584	Nest	2012	0.572222	0.06	0.875	1.7	33	100	4	2	2	30	10	0	0	87.5	1	Hardwood	21.2044	Treated
104774	Adult	Destroyed	35.7321	-93.8886	Nest	2013	0.923333	0.09	1.225	1.1	32	60	0.75	0.5	1.25	10	0.5	12.5	0	87.5	3	Hardwood	53.4039	Treated
104776	Sub-Adult	Destroyed	35.609	-93.9953	Nest	2012	0.596111	0	0.875	9.1	8	90	15	1	0	48	34	0	2.5	60	-	Pine	26.1427	Untreated
104779	Adult	Destroyed	35.7732	-93.9004	Nest	2012	0.876667	0.41	1.875	12.7	8	60	0	2	1	72	7	45	12.5	15	-	Hardwood	12.9822	Untreated
104780	Adult	Destroyed	35.6785	-94.0004	Nest	2013	0.988333	0.375	2	37.9	12	70	0	0	2	5.75	1.75	1.25	0	30	4	Hardwood	38.6555	Treated
104780	Adult	Hatched	35.6494	-94.0016	Nest	2012	0.74	0.745	2	10.5	18	90	8	3	1	10	7	0	0	50	-	Hardwood	187.37	Untreated
104783	Adult	Destroyed	35.723	-93.8873	Nest	2012	0.746667	0	0.925	19.8	43	20	12	1	7	22	6	5	2.5	50	2	Hardwood	42.7686	Treated
104784	Adult	Destroyed	35.6424	-94.0108	Nest	2012	0.711667	0.29	1.925	1	33	70	4	5	6	41	0	0	0	37.5	-	Hardwood	15.5552	Untreated
104785	Adult	Destroyed	35.7388	-93.885	Nest	2012	0.986667	0.195	1.525	7.2	33	90	7	3	5	35	11	0	30	42.5	2	Hardwood	76.3399	Treated
104785	Adult	Destroyed	35.7196	-93.8898	Nest	2013	0.91	0.24	1.15	16.2	6	70	3.25	1	0.25	1.25	0.75	12.5	0	55	3	Hardwood	23.9859	Treated
104786	Adult	Destroyed	35.7312	-93.894	Nest	2012	0.963333	0.11	1.5	10.2	9	10	18	0	2	36	0	7.5	0	40	2	Hardwood	20.8169	Treated
104787	Adult	Destroyed	35.7012	-93.8606	Nest	2013	0.693333	0	0.675	1	38	100	0.5	2.25	1.75	3	0	3.75	17.5	50	1	Hardwood	32.8042	Treated
104788	Sub-Adult	Destroyed	35.6904	-93.8402	Nest	2013	0.740556	0.115	1.15	11.9	38	60	0.75	1.75	2	7.5	0	25	5	25	0	Hardwood	11.6734	Treated
104789	Adult	Hatched	35.7674	-93.8586	Nest	2012	0.466667	0.34	1.925	1	26	90	1	0	1	43	0	10	0	32.5	-	Hardwood	24.1646	Untreated
104790	Sub-Adult	Destroyed	35.6569	-94.0216	Nest	2012	0.983333	0.77	2	1	8	100	0	0	0	18	0	0	0	70	-	Hardwood	51.4232	Untreated
117776	Adult	Destroyed	35.6387	-93.972	Nest	2013	0.923889	0.29	1.175	42.5	12	100	1.5	0	1.25	8	3.75	0	0	6.25	-	Pine	169.732	Untreated
117777	Sub-Adult	Destroyed	35.6394	-93.9341	Nest	2013	0.443333	0.16	0.5	1	0	100	1.25	1.25	1.25	7.25	1	0	0	27.5	4	Hardwood	104.294	Treated
117778	Adult	Destroyed	35.6348	-93.9408	Nest	2013	0.668333	0	0.95	2.4	39	40	2	0	2.25	1	0.25	2.5	0	3.75	-	Hardwood	24.1889	Untreated
117779	Sub-Adult	Destroyed	35.8026	-93.8568	Nest	2013	0.920556	0.195	1.325	1.6	2	70	1	0	1.75	4	0.5	17.5	5	50	-	Pine	85.8378	Untreated
117780	Sub-Adult	Destroyed	35.6668	-93.99	Nest	2013	0.896667	0.035	1.05	10.8	4	80	0.25	0	0.75	2.25	1	10	5	22.5	4	Hardwood	533.894	Treated
126436	Adult	Destroyed	35.7191	-93.8808	Nest	2013	0.91	0.07	1.15	7.3	19	70	0.5	0.5	1.25	4.25	0	1.25	0	32.5	2	Hardwood	27.2087	Treated
126437	Adult	Hatched	35.6346	-93.9738	Nest	2013	0.666111	0.09	0.125	2.4	46	20	1.25	1.75	2	3.75	0	2.5	0	40	-	Pine	18.3257	Untreated
126438	Adult	Destroyed	35.7004	-93.8679	Nest	2013	0.797778	0.01	1.025	6.5	40	20	2.5	0.75	1.75	0	0.5	10	0	40	1	Hardwood	199.91	Treated
126439	Adult	Destroyed	35.7085	-93.8844	Nest	2013	1	0.265	1.25	20	1	50	0	0	2.75	3.5	0	0	0	1.25	1	Pine	45.5495	Treated
126441	Sub-Adult	Destroyed	35.6492	-93.987	Nest	2013	0.826667	0.4	1.225	40	7	100	0.25	0	2.5	11.75	0.25	0	0	15	-	Hardwood	113.022	Untreated
126443	Adult	Destroyed	35.6345	-93.9409	Nest	2013	0.801852	0.52	2	19.5	70	100	3.25	0.75	2.25	0.5	0	0	0	6.25	-	Hardwood	14.7207	Untreated
126444	Sub-Adult	Destroyed	35.6997	-93.9004	Nest	2013	0.993333	0.82	2	17.6	44	0	3	0.5	0.75	2	2.5	7.5	0	36.25	3	Hardwood	108.584	Treated
126447	Adult	Destroyed	35.6719	-93.9021	Nest	2013	1	0.435	2	49.8	8	60	0.5	2.25	1	8.25	0	5	0	92.5	3	Hardwood	32.7689	Treated
126448	Sub-Adult	Destroyed	35.6938	-93.8834	Nest	2013	0.272222	0	0.5	1.6	40	100	3.75	1	1.5	3	1.25	3.75	3.75	27.5	1	Hardwood	33.8955	Treated
126450	Adult	Hatched	35.6947	-93.9013	Nest	2013	0.756667	0.18	1.3	1.9	19	100	2	0.5	1.25	4.25	0.5	0	0	55	3	Hardwood	40.6566	Treated
126451	Adult	Hatched	35.7105	-93.8789	Nest	2013	0.893333	0.045	1.25	4.1	25	70	0.75	0	1	13	3	2.5	0	67.5	2	Hardwood	13.8333	Treated
